# Supplementary material for: Nitrous acid formation in a snow-free wintertime polluted rural area
Source: Copernicus journal article supplement (doi:10.5194/acp-2017-648), 2017-08-04
Supplement: Supplementary file [file acp-2017-648-RC2-supplement.pdf]

Review on:

## Nitrous acid formation in a snow-free wintertime polluted rural area

By Tsai et al.

### Summary:

The authors present a very good study on missing photochemical HONO sources. They performed field measurements in the Uintah Basin, including HONO detection on 3 different heights. They observed higher concentrations near the ground and the determined flux followed the diel pattern of solar radiation (or photolysis frequency J). By performing budget analysis (pss calculation) a missing daytime HONO source was found. But the budget could be closed by adding the observed ground source. By correlation studies the authors conclude that a major part of HONO is formed on the ground either by light enhanced/induced heterogeneous reactions of NO<sub>2</sub> or by photolysis of adsorbed HNO<sub>3</sub> depending on the ambient NO<sub>x</sub> level. The study is underlined by model simulations (RCAT and WRF-Chem).

In general the manuscript is clearly written.

I suggest to publish the manuscript after the authors have addressed following minor comments:

### Concerning the understanding/scientific issues:

Method part:

- NO<sub>x</sub> measurements: as you mentioned only the uncertainty/LOD of NO but later mainly discuss NO<sub>2</sub> or NO<sub>x</sub>, please also add the detection limit of NO<sub>2</sub>. Specify the converter efficiency (what is the fraction of NO<sub>2</sub> which is converted into NO during analysis, ~30% ??).
- P7 L 28: which CO instrument? You also note the techniques for the other compounds (GC/MS, Picarro, DOAS, ...)
- I think the whole section is too long for the main manuscript. You could describe shortly the methods in the main manuscript and move the detailed description to a supplement.

Results/discussion:

- P12 L19-20 (fig 6b): I don't understand why you are not using the measured mixing ratios here ("...calculated from retrieved HONO vertical profiles..."). Please explain!
- P14 L10: how long is the HONO lifetime, which time is too long to allow pss interpretation?
- P14 L23: Why not using the heterogeneous conversion rate (1.6% h<sup>-1</sup>, e.g. Su et al., AE 42 (2008) 6219–6232) here, the 50% yield is only according to stoichiometry
- Fig 9: (e,f) are these the scaled fluxes?, please extent the capture;(b) why there is the discrepancy of the NO<sub>2</sub> modeling on 27 Feb in the mornings (6-11 am) while the modelling in NO<sub>2</sub> on Feb 4 is quiet good (even in the strong plume)?
- Fig 3: Can you explain why the model overpredicted the HONO at 11:00 and 12:00 and underestimated it at 13:00 – It is not a very good agreement (if only the shape is considered yes, but not the absolute values)

### Linguistic/graphic issues:

- P2 L8: recycling of NO<sub>x</sub>, or NO<sub>x</sub> recycling
- P6 L15: cite correctly (Williams et al., year xy)
- P7 L16: the acronym RACM stands for Regional Atmospheric Chemistry Mechanism
- P7 L19: wrong bracket setting: ... equation by Fuks and Sutugin (1971).

- P10 L23: ...dominated by weak winds (delete periods)
- P15 L7: "leaf surface" said twice in one sentence – delete one time (... product of photolysis rate of HNO<sub>3</sub> and nitrate loading on leaf surface... or add "adsorbed" HNO<sub>3</sub>...)

**References:**

- P17 L1-5. Wrong reference – this should be VandenBoer et al., 2015, not 2014?! In (2014) VandenBoer et al. suggested a ground reservoir but don't argued with acid displacement.
- In the list: Wong et al., 2011 not correct cited – Journal name missing, check also other references if form is consistent

**Figures:**

- Fig. 4: Please draw clearer – especially in the HONO plot, dots are hardly to distinguish (maybe use lines instead, or remove error bars?) – what do the error bars mean?
- Sometimes you use left or right panel in the capture but in the figure you label it with a and b – so please also refer to a,b in the capture (fig 2: label single plots as a,b,c – as written in the capture)
- Fig 5/6: why not also explain the colors here?
- Fig 6/7/8/9: meaning of error bars
- Fig 9 (b) the HNO<sub>3</sub> layer is shifted
- MST = local time????, please explain
